# Supplementary material for: Non-equivalent carbon crediting across agricultural land management protocols
Source: Research Square preprint supplement (doi:10.21203/rs.3.rs-6179173/v1), 2025-03-18
Supplement: Supplementary file 1 [file b4caa5d7c22bd47fb659ca03.xlsx]

## Sheet: Total Risk
Supplmental File: VERRA BUFFER POOL RISK ASSESSMENT
Following	Verified Carbon Standard, “AFOLU Non-Permanence Risk Tool” (VCS, 2019) 22 pps.
	https://verra.org/wp-content/uploads/2019/09/AFOLU_Non-Permanence_Risk-Tool_v4.0.pdf
Total Internal Risk (Table 5)
Risk Category	Description	Risk_Max	Risk_Min	Our Score
a)	Project Management Risk	8	-4	-2
b)	Financial Viability Risk	6	0	0
c)	Opportunity Cost Risk	8	-8	-2
d)	Project Longevity Risk	28	0	15
	Total Internal Risk, may not be less than 0]	50	-12	11
Total External Risk (Table 9)
Risk Category	Description	Risk_Max	Risk_Min	Our Score
a)	Land Tenure Risk	22	0	2
b)	Community Engagement	15	-5	0
c)	Political Risk	8	0	0
	Total External Risk, may not be less than 0]	45	-5	2
Total Natural Risk (Table 10)
Fire Risk (F)					0
Pest and disease outbreaks (PD)					2
Extreme weather risk (W)					5
Geological risk (G)					0
Total Natural Risk (as applicable, F + PD + W + G)					7
Table 11: Overall Risk Rating
Risk Category	Description	Our Score
a)	Total Internal Risk	11
b)	Total External Risk	2
c)	Total Natural Risk	7
	Total Overall Risk (a + b + c)	20

## Sheet: Internal Risks
Internal Risk: Project Management (Table 1)
Risk Category	Description	Score	Our Risk Score	Justification	Citations (if applicable)
a)	Species planted (where applicable) associated with more than 25% of the stocks on which GHG credits have previously been issued are not native or proven to be adapted to the same or similar agro-ecological zone(s) in which the project is located. [Evidence that species planted are adapted to the same or similar agro-ecological zone(s) in which the project is located may be demonstrated through: p…	2	2	Corn, soy and winter wheat are all proven to be adapted to the study region in current climates, but also may become less adaptable with changing climatic conditions without interventions.	https://link.springer.com/article/10.1007/s10584-017-1997-x; https://www.nature.com/articles/s41598-021-91192-5
b)	Ongoing enforcement to prevent encroachment by outside actors is required to protect more than 50% of stocks on which GHG credits have previously been issued.	2	0	We assume that the risk of encroachment of outside actors is low for our project area, and that projects will have sufficient staffing to reduce risk even further.
c)	Management team does not include individuals with significant experience in all skills necessary to successfully undertake all project activities (i.e., any area of required experience is not covered by at least one individual with at least 5 years’ experience in the area).	2	0	We assume that management team will be properly staffed to minimize these risk categories and mitigate risk.
d)	Management team does not maintain a presence in the country or is located more than a day of travel from the project site, considering all parcels or polygons in the project area. [Management teams are those responsible for day-to-day project management and the implementation of project activities. Management teams may be made up of the project proponent, the implementing partner (see the VCS Pro…	2	0
e)	Mitigation: Management team includes individuals with significant experience in AFOLU project design and implementation, carbon accounting and reporting ( e.g., individuals who have successfully managed projects through validation, verification and issuance of GHG credits) under the VCS Program or other approved GHG programs.	-2	-2
f)	Mitigation: Adaptive management plan in place.	-2	-2	We assume that project will write an adaptive management plan.
	Total Project Management (PM) [as applicable, (a + b + c + d + e + f), may be less than 0]		-2
Internal Risk: Financial Viability (Table 2)
Risk Category	Description	Risk_Max	Our Score	Justification	Citations
a)	Project cash flow breakeven point is greater than 10 years from the current risk assessment	3	0	We assume that the project will breakeven at less than 4 years.
b)	Project cash flow breakeven point is greater than 7 and up to 10 years from the current risk assessment	2	0
c)	Project cash flow breakeven point greater than 4 and up to 7 years from the current risk assessment	1	0
d)	Project cash flow breakeven point is 4 years or less from the current risk assessment	0	0
e)	Project has secured less than 15% of funding needed to cover the total cash out before the project reaches breakeven	3		We assume that the project has substanial initial funding in place to cover initial costs prior to credit sales.
f)	Project has secured 15% to less than 40% of funding needed to cover the total cash out required before the project reaches breakeven required before the project reaches breakeven	2	0
g)	Project has secured 40% to less than 80% of funding needed to cover the total cash out required before the project reaches breakeven	1	0
h)	Project has secured 80% or more of funding needed to cover the total cash out before the project reaches breakeven	0	0
i)	Mitigation: Project has available as callable financial resources at least 50% of total cash out before project reaches breakeven	-2	0
	Total Financial Viability (FV) [as applicable, ((a, b, c, or d) + (e, f, g, or h) + i, may not be less than 0]		0
Internal Risk: Opportunity Cost (Table 3)
Risk Category	Description	Risk_Max	Our Score	Justification	Citations
a)	NPV from the most profitable alternative land use activity is expected to be at least 100% more than that associated with project activities; or where baseline activities are subsistence-driven, net positive community impacts are not demonstrated	8	0	While the economic impacts of no-till and cover crops are highly variable, there is evidence which suggests their economic impact is marginal (<20%).	https://www.cambridge.org/core/services/aop-cambridge-core/content/view/488B324AD119DDC661D5F4271035FC1B/S1742170517000278a.pdf/div-class-title-a-review-of-economic-considerations-for-cover-crops-as-a-conservation-practice-div.pdf ; https://www.cambridge.org/core/services/aop-cambridge-core/content/view/5AAA15F580428B31D0E627273EFDD143/S1742170511000524a.pdf/organic-no-tillage-system-effects-on-s…
b)	NPV from the most profitable alternative land use activity is expected to be between 50% and up to100% more than from project activities	6	0
c)	NPV from the most profitable alternative land use activity is expected to be between 20% and up to 50% more than from project activities	4	0
d)	NPV from the most profitable alternative land use activity is expected to be between 20% more than and up to 20% less than from project activities; or where baseline activities are subsistence-driven, net positive community impacts are demonstrated	0	0
e)	NPV from project activities is expected to be between 20% and up to 50% more profitable than the most profitable alternative land use activity	-2	0	We do not assume large profits from these management changes.
f)	NPV from project activities is expected to be at least 50% more profitable than the most profitable alternative land use activity	-4	0
g)	Mitigation: Project proponent is a non-profit organization	-2	0
h)	Mitigation: Project is protected by legally binding commitment (see Section 0) to continue management practices that protect the credited carbon stocks over the length of the project crediting period	-2	-2	We assume project developer required legal agreement with participating landowners to continus practice, and that the project longevity was the VCS minimum as of January 1, 2021 (30 years).
i)	Mitigation: Project is protected by legally binding commitment (see Section 0) to continue management practices that protect the credited carbon stocks over at least 100 years	-8	0
	Total Opportunity Cost (OC) [as applicable, ((a, b, c, d, e, or f) + (g + h or i), may be less than 0]		-2
Internal Risk: Project Longevity (Table 4)
Risk Category	Description	Risk_Max	Our Score	Justification	Citations
a)	Without legal agreement or requirement to continue to manage practice	24 - (project longevity/5)	0	We assume project developer required legal agreement with participating landowners to continus practice, and that the project longevity was the VCS minimum as of January 1, 2021 (30 years).
b)	With legal agreement or requirement to continue the management practice	30 - (project longevity/2)	15
	Total Project Longevity (PL) [as applicable, (a or b), may not be less than 0]		15
Total Internal Risk (Table 5)
Risk Category	Description	Risk_Max	Risk_Min	Our Score
a)	Project Management Risk	8	-4	-2
b)	Financial Viability Risk	6	0	0
c)	Opportunity Cost Risk	8	-8	-2
d)	Project Longevity Risk	28	0	15
	Total Internal Risk, may not be less than 0]	50	-12	11

## Sheet: External Risks
External Risk: Land Tenure (Table 6)
Risk Category	Description	Score	Our Risk Score	Justification	Citations
a)	Ownership and resource access/use rights are held by the same entity	0	0	It is likely that some portion of the enrolled fields are not directly owned by growers or project proponent.
b)	Ownership and resource access/use rights are held by different entity(s) (e.g., land is government owned and the project proponent holds a lease or concession)	2	2
c)	In more than 5% of the project area, there exist disputes over land tenure or ownership	10	0	We assume that project developer would not enroll fields without clear land tenure rights.
d)	There exist disputes over access/use rights (or overlapping rights)	5	0
e)	WRC projects unable to demonstrate that potential upstream and sea impacts that could undermine issued credits in the next 10 years are irrelevant or expected to be insignificant, or that there is a plan in place for effectively mitigating such impacts	5	0	Not Applicable: this is not a Wetlands Restoration and Conservation Project.
f)	Mitigation: Project area is protected by legally binding commitment (e.g., a conservation easement or protected areas) to continue management practices that protect carbon stocks over the length of the project crediting period	-2	0	Unlikely to have conservation easements placed over the entirety of project.
g)	Mitigation: Where disputes over land tenure, owenership or access/use rights exist, documented evidence is provided that projects have implemented activities to resolve the disputes or clarify overlapping claims	-2	0	Not Applicable: We assume property with disputed land rights would not be allowed to enroll by third party developer.
	Total Land Tenure (LT) [as applicable, (a or b) + c + d + e + f + g), may not be less than 0]		2
External Risk: Community Engagement (Table 7)
Risk Category	Description	Score	Our Risk Score	Justification	Citations
a)	Less than 50 percent of households living within the project area who are reliant on the project area, have been consulted	10	0	Not applicable to our project; private farms are not a public natural resource that community members rely on for essential food, fuel, fodder, medicines or building materials
b)	Less than 20 percent of households living within 20km of the project boundary outside the project area, and who are reliant on the project area, have been consulted	5	0
c)	Mitigation: The project generates net positive impacts on the social and economic well-being of the local community who derive livelihoods from the project area	-5	0
	Total Community Engagement (CE) [as applicable, (a + b + c), may be less than 0]		0
External Risk: Political Risk (Table 8)
Risk Category	Description	Score	Our Risk Score	Justification	Citations
a)	Governance score of less than -0.79	6	0	USA average WGI index is 1.14 (see tab)
b)	Governance score of -0.79 to less than -0.32	4	0
c)	Governance score of -0.32 to less than 0.19	2	0
d)	Governance score of 0.19 to less than 0/82	1	0
e)	Governance score of 0.82 or higher	0	0
f)	Mitigation: Country is implementing REDD+ Readiness or other activities, as set out in this Section 2.3.3	-2	0	Not a forest project; no mitigation
	Total Land Tenure (LT) [as applicable, (a, b,c,d, or e) + f , may not be less than 0]		0
Total External Risk (Table 9)
Risk Category	Description	Risk_Max	Risk_Min	Our Score
a)	Land Tenure Risk	22	0	2
b)	Community Engagement	15	-5	0
c)	Political Risk	8	0	0
	Total External Risk, may not be less than 0]	45	-5	2

## Sheet: WGI Data
Voice and Accountability
		2016	2017	2018	2019	2020
Country/Territory	Code	Estimate	Estimate	Estimate	Estimate	Estimate	AVERAGE
United States	USA	1.11026	1.00635	0.995732	0.905322	0.855866	0.974706
Political Stability and Absence of Violence/Terrorism
		2016	2017	2018	2019	2020
Country/Territory	Code	Estimate	Estimate	Estimate	Estimate	Estimate
United States	USA	0.385635	0.262202	0.386043	0.117877	-0.0269291	0.224965
Government Effectiveness
		2016	2017	2018	2019	2020
Country/Territory	Code	Estimate	Estimate	Estimate	Estimate	Estimate
United States	USA	1.44153	1.5174	1.53704	1.45356	1.27514	1.44493
Regulatory Quality
		2016	2017	2018	2019	2020
Country/Territory	Code	Estimate	Estimate	Estimate	Estimate	Estimate
United States	USA	1.48562	1.61908	1.61314	1.33457	1.23844	1.45817
Rule of Law
		2016	2017	2018	2019	2020
Country/Territory	Code	Estimate	Estimate	Estimate	Estimate	Estimate
United States	USA	1.58051	1.60738	1.47569	1.42404	1.33538	1.4846
Control of Corruption
		2016	2017	2018	2019	2020
Country/Territory	Code	Estimate	Estimate	Estimate	Estimate	Estimate
United States	USA	1.33148	1.3404	1.29268	1.18073	1.03822	1.2367
							1.13735
	A governance score (of between -2.5 and 2.5) shall be calculated from the mean of
	Governance Scores across the six indicators of the World Bank Institute’s Worldwide
	Governance Indicators (WGI)1, averaged over the most recent five years of available data.
	Governance scores shall be translated into risk scores as set out in Table 9.

## Sheet: Natural Risks
Natural Risks (Table 10)
	Likelihood
Significance	Less than every 10 years	Every 10 to less than 25 years	Every 25 to less than 50 years	Every 50 to less than 100 years	Once every 100 years or more, or risk is not applicable to project area
Catastrophic (70% or more loss of carbon stocks)	FAIL	30	20	5	0
Devastating (50% to less than 70% loss of carbon stocks)	30	20	5	2	0
Major (25% to less than 50% loss of carbon stocks)	20	5	2	1	0
Minor (5% to less than 25% loss of carbon stocks)	5	2	1	1	0
Insignificant (less than 5% loss of carbon stocks) or transient (full recovery of lost carbon stocks expected within 10 years of any event)	2	1	1	0	0
No Loss	0	0	0	0	0
LS Score: Fire Risk					0	Fire risks very low across project region.
LS Score: Risk of pest/disease outbreaks					2	Risk of pest and disease outbreaks increasing with climate change.
LS Score: Extreme weather risk					5	Risk of extreme weather events higher since the project is geographically concentrated
				LS Score: Geological Risk	0	No geologically significant activity in the project area.
Mitigation (M)
Prevention measures applicable to the risk factor are implemented				0.5
Project Proponent has proven history of effectively containing natural risk				0.5
Both of the above				0.25
None of the above				1
M Score: Fire Risk					1
M Score: Risk of pest/disease outbreaks					1
M Score: Extreme weather risk					1
M Score: Geological risk					1
Score for each natural risk applicable to the project (determined by (LS x M))
Fire Risk (F)					0
Pest and disease outbreaks (PD)					2
Extreme weather risk (W)					5
Geological risk (G)					0
Total Natural Risk (as applicable, F + PD + W + G)					7
